# Supplementary material
Source: Research Square preprint supplement (doi:10.21203/rs.3.rs-9855754/v1)
Supplement: Supplementary file 1 [file 053ceb080ccb12692a55a374.pdf]

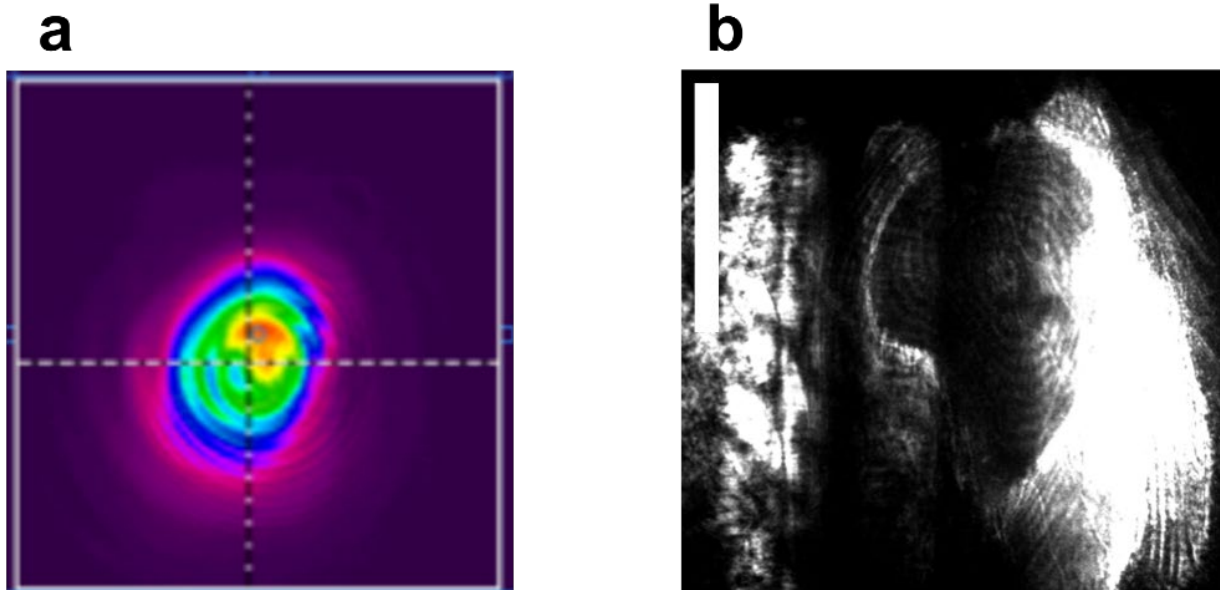

**Extended Data Fig. 7. | The spatial distribution of the interference fringes follows the incident laser beam profile. a**, Independent measurement of the femtosecond pump laser beam profile recorded by a CCD-based laser beam profiler. **b**, Single-shot DFXM image of the Cu(111) thin film ( $TTBD = 0.039 \mu\text{m}^{-1}$ ) acquired at a pump–probe delay of 100 ps under the same laser conditions. The envelope of the interference fringe pattern reproduces the elliptical footprint of the pump laser profile in **a**, confirming that the picosecond near-surface disordering is confined to the photoexcited region. Scale bar, 50  $\mu\text{m}$ .
