# Supplementary material
Source: Research Square preprint supplement (doi:10.21203/rs.3.rs-9855754/v1)
Supplement: Supplementary file 2 [file 284f77be192c0afe5173efb3.pdf]

**Extended Data Table 1. | Material parameters used in the TTM simulations for Cu.**

| Parameter                                    | Value                                                                        |
|----------------------------------------------|------------------------------------------------------------------------------|
| Electron heat capacity, $C_e = \gamma_e T_e$ | $\gamma_e = 96.6 \text{ J}/(\text{m}^3 \cdot \text{K})$                      |
| Lattice heat capacity, $C_l$                 | $3.45 \times 10^6 \text{ J}/(\text{m}^3 \cdot \text{K})$                     |
| Electron thermal conductivity, $K_e$         | $230 \cdot \left(\frac{T_e}{T_l}\right) \text{ W}/(\text{m} \cdot \text{K})$ |
| Electron–phonon coupling, $G$                | $1.0 \times 10^{17} \text{ W}/(\text{m}^3 \cdot \text{K})$                   |
| Mass density, $\rho$                         | $8960 \text{ kg}/\text{m}^3$                                                 |
| Complex refractive index (400 nm)            | $n = 1.34 + 1.82i$                                                           |
