# Supplementary material
Source: Research Square preprint supplement (doi:10.21203/rs.3.rs-9855754/v1)
Supplement: Supplementary file 4 [file 81ac3b7030410e84f462fed5.pdf]

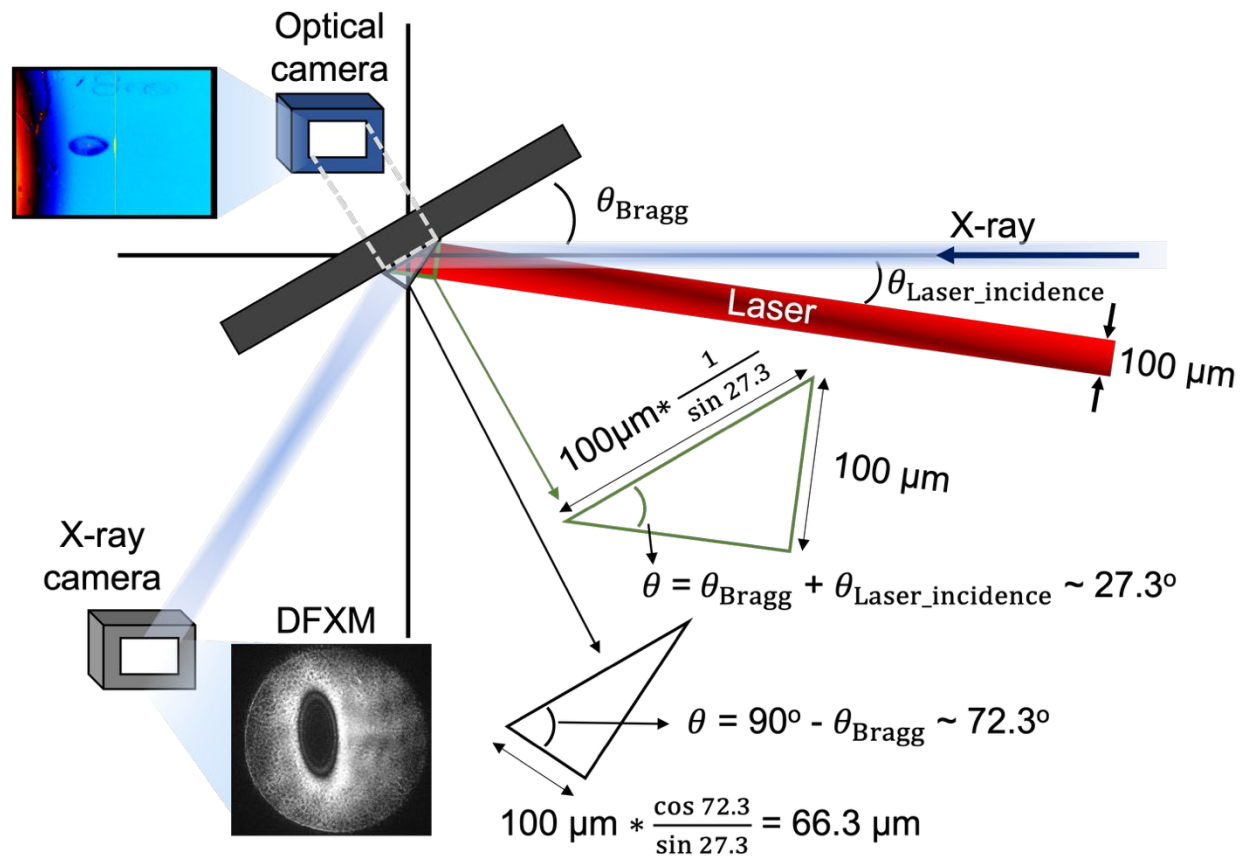

**Extended Data Fig. 4. | Relationship between the sample surface projection and the observed projection on the X-ray detector.** The projection on the sample surface is influenced by the Bragg angle and laser incident angle, while the observed projection on the detector is determined by the geometric constraints of Bragg reflection.
