# Supplementary material
Source: Research Square preprint supplement (doi:10.21203/rs.3.rs-9855754/v1)
Supplement: Supplementary file 6 [file 9eb4bc3c5d957a9019911da5.pdf]

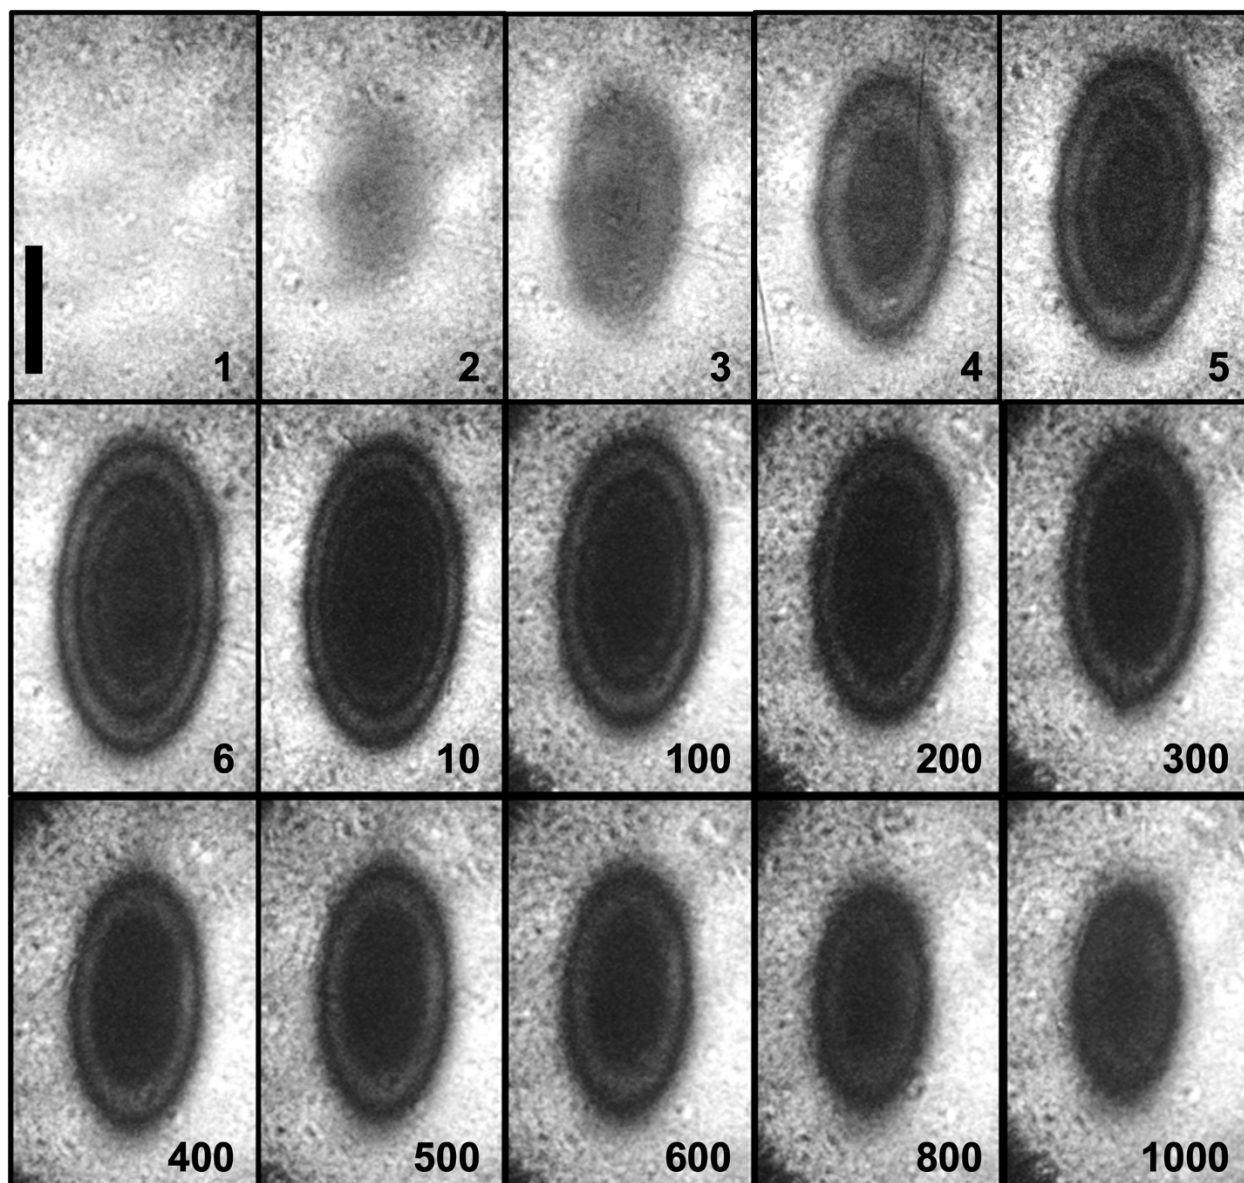

**Extended Data Fig. 2. | The interference fringes evolution in tr-DFXM.** At 1 ps, no clear evidence of lattice distortion is observed. Distortion-induced contrast emerges at 2 ps, and the interference fringes become fully developed at approximately 5 ps. Time intervals were chosen to capture both the initial fringe formation (1–6 ps) and the slower contrast decay (10–1000 ps). After 6 ps, the formation of the pattern remains unchanged, however, its total intensity gradually diminishes. The number is in picoseconds and the black vertical scale bar indicates 50  $\mu\text{m}$ .
