# Supplementary material
Source: Research Square preprint supplement (doi:10.21203/rs.3.rs-9855754/v1)
Supplement: Supplementary file 7 [file bb6d2a039ad4cb4d85aeb7c8.pdf]

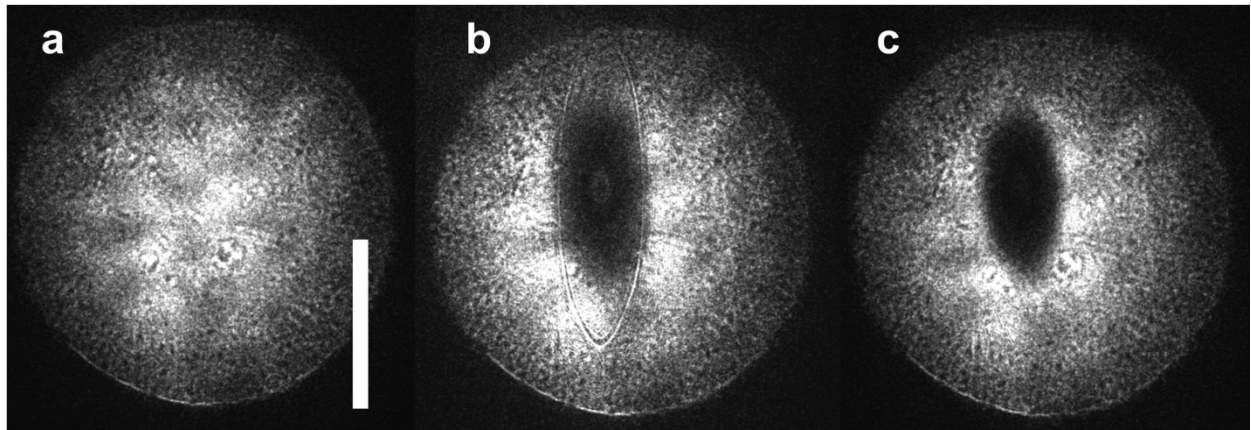

**Extended Data Fig. 8.** | **The supersonic wavefront leaves no permanent trace outside the central laser-damaged region, identifying it as a purely elastic disturbance.** Three-image experimental sequence recorded on a Cu(111) thin film with TTB density ( $2.175 \mu\text{m}^{-1}$ ) under femtosecond laser excitation at  $200 \text{ mJ}/\text{cm}^2$ . **a**, Reference DFXM image recorded before laser arrival (pre-pump). **b**, Single-shot DFXM image acquired at a pump-probe delay of 25.2 ns, capturing the supersonic wavefront propagating radially outward from the excitation centre. **c**, DFXM image of the same sample region recorded after excitation. The central spot shows permanent laser-induced damage from direct absorption. The absence of permanent residual contrast along the wavefront trajectory identifies the wavefront as purely elastic. Scale bar, 100  $\mu\text{m}$ .
