# Supplementary material
Source: Research Square preprint supplement (doi:10.21203/rs.3.rs-9855754/v1)
Supplement: Supplementary file 9 [file c12ec8ef77a81c6c16835232.pdf]

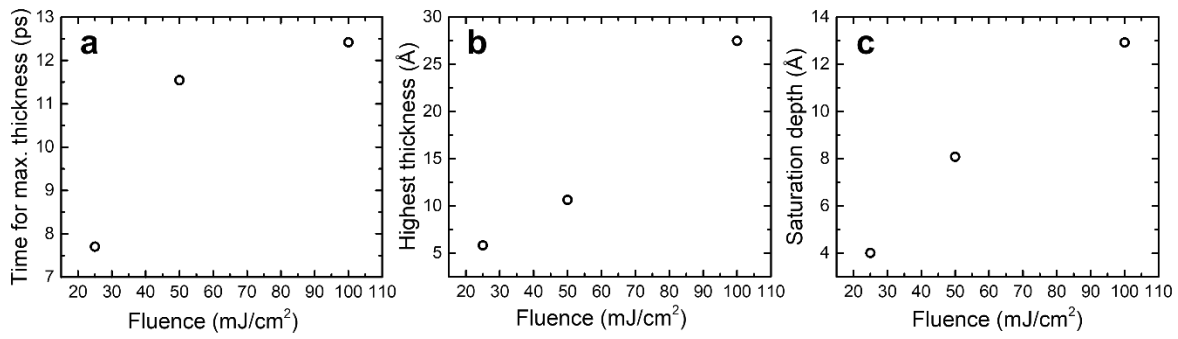

**Extended Data Fig. 6. | Dependence of ultrafast disorder dynamics on laser fluence. a,** Time required to reach the maximum disordered-layer thickness as a function of fluence. **b,** Maximum disordered-layer thickness as a function of fluence. **c,** Saturation depth of the disordered layer as a function of fluence. All three parameters exhibit a systematic increase with increasing fluence.
